# Supplementary material
Source: PubMed Central journal article supplement (PMC5340332)
Supplement: 1179FigureS1.pdf [file 1179FigureS1.pdf]

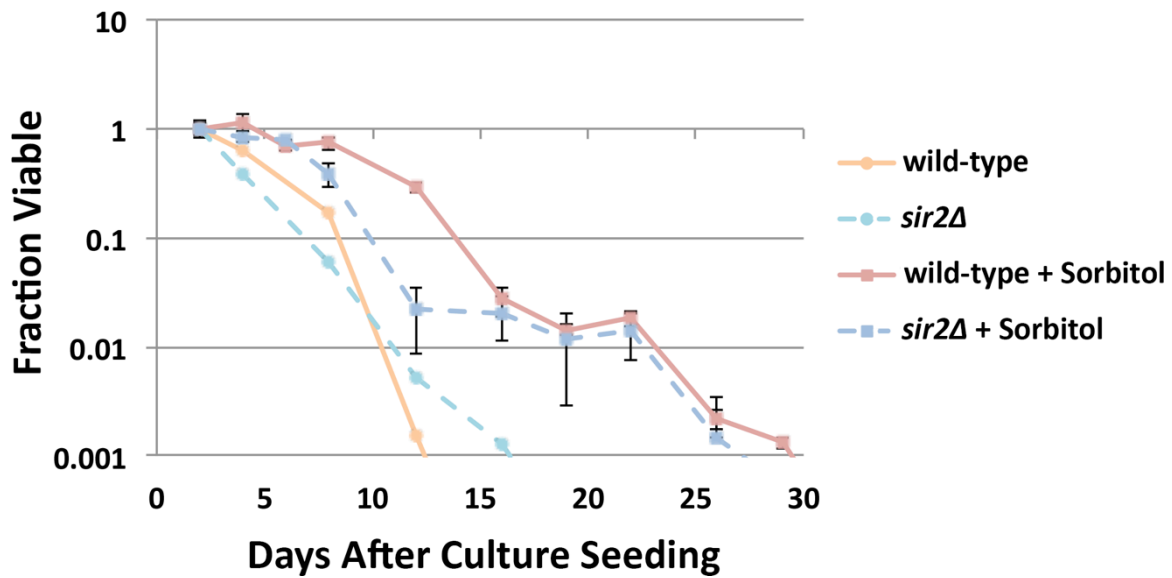

**Figure S1.** Increasing osmotic pressure of 2%-glucose cultures increases chronological lifespan. Adding sorbitol to increase the osmotic pressure of 2%- glucose cultures to that of 12%-glucose cultures does not decrease lifespan, and instead increases it. The change in lifespan between 2%- and 12%-glucose cultures is therefore not explained by differences in the osmotic pressure of the culture media. Inclusion or exclusion of sorbitol did not significantly affect any other observations made in this study (data not shown). Y-axis is cut off at 0.001 to zoom in on most relevant viability window.
