# Supplementary material
Source: PubMed Central journal article supplement (PMC5340332)
Supplement: 1179FigureS2.pdf [file 1179FigureS2.pdf]

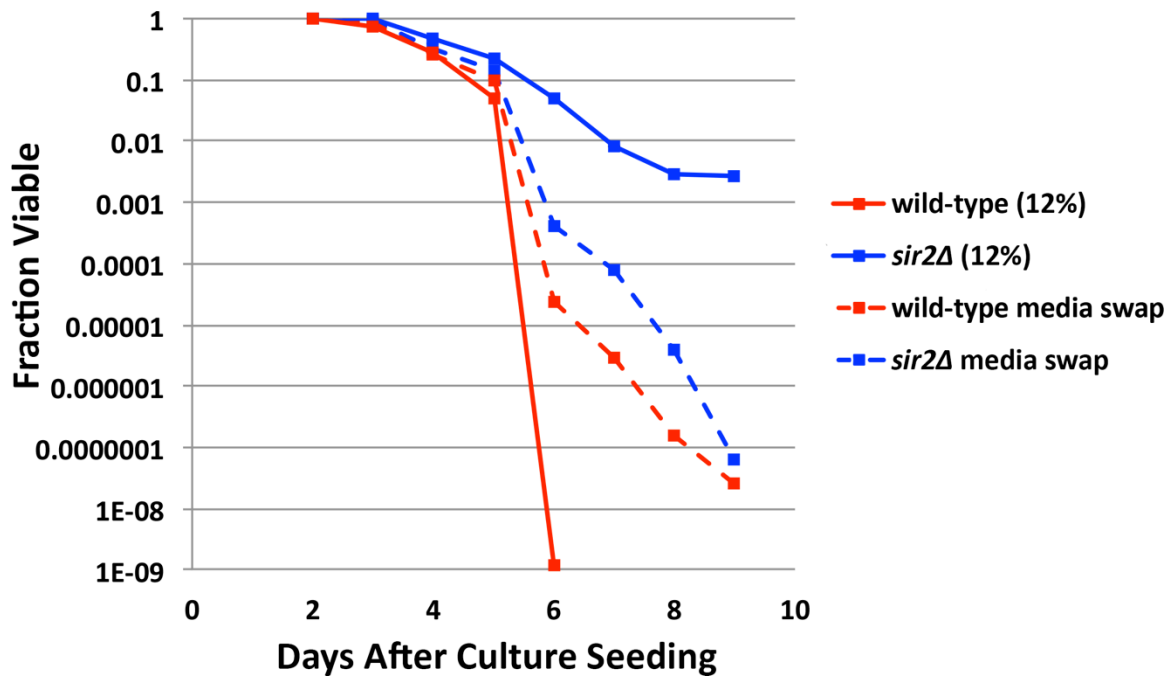

**Figure S2.** Cell-intrinsic and cell-extrinsic effects of Sir2 on chronological lifespan in high-glucose complete minimal medium. Wild-type and *sir2Δ* cultures were grown to stationary phase, and spent media from half of these cultures was swapped between genotypes. Swapping of spent media resulted in an intermediate phenotype for each genotype, demonstrating that Sir2-dependent cell-extrinsic changes to media composition aren't sufficient to explain the entire *sir2Δ* phenotype.
