# Supplementary material
Source: PubMed Central journal article supplement (PMC5340332)
Supplement: 1179TableS1.pdf [file 1179TableS1.pdf]

**Table S1.** Genotypes of yeast strains used in this study

| Strain:                                                 | Genotype:                                                                                                                                         | Source                       |
|---------------------------------------------------------|---------------------------------------------------------------------------------------------------------------------------------------------------|------------------------------|
| UCC8650                                                 | <i>MATa, his3Δ1, leu2Δ0, lys2Δ0, ura3Δ0, hoΔ::PSCW11-cre-EBD78-NATMX</i>                                                                          | D. Gottschling               |
| JRY527 (s288c)                                          | <i>MATa, ade2-101, lys2, ura3-52, his3Δ200, met2</i>                                                                                              | Lab collection               |
| JRY4012 (W303-1a)                                       | <i>MATa, his3, leu2, lys2, trp1, ura3, can1</i>                                                                                                   | R. Rothstein/ Lab collection |
| JRY8822 ( <i>S. bayanus</i> )                           | <i>MATa, lys2Δ, ura3Δ, hoΔ::NAT<sup>MX</sup></i>                                                                                                  | Lab collection               |
| JRY9135 ( <i>S. paradoxus</i> )                         | <i>MATa, lys2Δ, ura3Δ, hoΔ::NAT<sup>MX</sup></i>                                                                                                  | Lab collection               |
| JRY9628                                                 | <i>ADE2, lys2, TRP1, hmlα2Δ::CRE, matΔ::NatMX, ura3Δ::pGPD:loxP:yEmRFP;tCYC1:KanMX:loxP:yEGFP:tADH1</i>                                           | Lab collection               |
| JRY10759 (W303 x W303)                                  | <i>ADE2, lys2, trp1-1/TRP1, HML/hmlα2Δ::CRE, ura3-1/ura3Δ::pGPD:loxP:yEmRFP;tCYC1:KanMX:loxP:yEGFP:tADH1</i>                                      | This Study                   |
| JRY10762 (W303 x s288c)                                 | <i>ade2-101/ADE2, lys2, TRP1, HML/hmlα2Δ::CRE, ura3-52/ura3Δ::pGPD:loxP:yEmRFP;tCYC1:KanMX:loxP:yEGFP:tADH1, his3Δ200/HIS3, met2/MET2</i>         | This Study                   |
| JRY10765 ( <i>S. cerevisiae</i> x <i>S. bayanus</i> )   | <i>ADE2, lys2, TRP1, HML/hmlα2Δ::CRE, ura3Δ/ura3Δ::pGPD:loxP:yEmRFP;tCYC1:KanMX:loxP:yEGFP:tADH1, hoΔ::NAT<sup>MX</sup>/ho</i>                    | This Study                   |
| JRY10768 ( <i>S. cerevisiae</i> x <i>S. paradoxus</i> ) | <i>ADE2, lys2, TRP1, HML/hmlα2Δ::CRE, ura3Δ/ura3Δ::pGPD:loxP:yEmRFP;tCYC1:KanMX:loxP:yEGFP:tADH1, hoΔ::NAT<sup>MX</sup>/ho</i>                    | This Study                   |
| JRY10776                                                | <i>MATα ADE2, lys2, TRP1, hmlα2Δ::CRE, ura3Δ::pGPD:loxP:yEmRFP;tCYC1:KanMX:loxP:yEGFP:tADH1</i>                                                   | This Study                   |
| JRY10779                                                | <i>MATa his3 leu2 lys2 trp1 ura3 can1 sir2Δ::KAN<sup>MX</sup></i>                                                                                 | This Study                   |
| JRY10782                                                | <i>MATα ADE2, lys2, TRP1, ura3Δ::pGPD:loxP:yEmRFP;tCYC1:Kan<sup>MX</sup>:loxP:yEGFP:tADH1</i>                                                     | This Study                   |
| JRY10786                                                | <i>MATα ADE2, lys2, TRP1, ura3Δ::pGPD:loxP:yEmRFP;tCYC1:Kan<sup>MX</sup>:loxP:yEGFP:tADH1 hoΔ::PSCW11-cre-EBD78-NATMX</i>                         | This Study                   |
| JRY10787                                                | <i>MATα ADE2, lys2, TRP1, ura3Δ::pGPD:loxP:yEmRFP;tCYC1:Kan<sup>MX</sup>:loxP:yEGFP:tADH1 hoΔ::PSCW11-cre-EBD78-NATMX sir2Δ::NAT<sup>MX</sup></i> | This Study                   |
